# Supplementary material
Source: PubMed Central journal article supplement (PMC3465671)
Supplement: NIHMS395885-supplement.pdf [file NIHMS395885-supplement.pdf]

## **Supplementary Material**

**1) Supplementary Table 1 (66 disease causing mutations in branchpoints)**

**2) Supplementary Table 2 (Sequencing results of lariat validation)**

**3) Supplementary Figure 1 (Evidence for redundant and for non-redundant branchpoints in human pre-mRNA.)**

**4) Supplementary Figure 2 (Recovery rate of lariats by intron length)**

**5) Supplementary Figure 3 (Mutational profile of RT at branchpoints)**

**6) Supplementary Methods:**

**A) Computational Method**

**I. Lariat Discovery**

**II. Analysis**

**III. Statistical Tests**

**B) Experimental Methods**

**I. RT-PCR validation of Lariats**

Further resources can be found at <http://fairbrother.biomed.brown.edu/data/Lariat/>  
or [fairbrother@brown.edu](mailto:fairbrother@brown.edu)

“Large-scale mapping of branchpoints in human pre-mRNA transcripts *in vivo*.” Taggart et al.

Supplementary Table 1

|                                             | HGMD ID  | Gene Symbol | Original Base | New Base | New Sequence                      |
|---------------------------------------------|----------|-------------|---------------|----------|-----------------------------------|
| Hypoglycaemia, persistent hyperinsulinaemic | CS961698 | ABCC8       | A             | G        | TGGCCTC <b>A</b> CTTGTGC          |
| Hypoglycaemia, persistent hyperinsulinaemic | CS050778 | ABCC8       | G             | A        | CCTGGGC <b>G</b> GTGGGAC          |
| Adenosine deaminase deficiency              | CS930753 | ADA         | G             | A        | GTTCTCT <b>G</b> GTTCAT           |
| Spherocytosis                               | CS961473 | ANK1        | C             | T        | CTCTCCCC <b>G</b> GGCCGGC         |
| Hypertriglyceridaemia                       | CS075066 | APOC2       | G             | A        | GCCCCAC <b>G</b> GGCTCTC          |
| Primary microcephaly                        | CS091963 | ASPM        | A             | G        | GAATATA <b>A</b> TATCTGG          |
| Bardet-Biedl syndrome ?                     | CS032059 | BBS2        | A             | G        | ACTTTT <b>A</b> AATTTGTG          |
| Breast cancer ?                             | CS045210 | BRCA1       | T             | C        | TA <b>A</b> CTAGT <b>G</b> TTTCTT |
| Breast cancer                               | CS982093 | BRCA2       | A             | G        | <b>A</b> AATTTATA <b>A</b> AGCAGC |
| Agammaglobulinaemia                         | CS961496 | BTK         | A             | G        | GAGTCTC <b>A</b> CTGGTCT          |
| Muscular dystrophy, limb girdle             | CS053449 | CAPN3       | C             | G        | GCTCTCT <b>C</b> TCTTCTT          |
| Cystic fibrosis                             | CS001829 | CFTR        | T             | C        | ACCAACAT <b>G</b> TTTTCT          |
| Cystic fibrosis                             | CS086376 | CFTR        | G             | A        | TTGCAAT <b>G</b> TTTTCTA          |
| Alport syndrome                             | CS982128 | COL4A4      | A             | G        | GCCTT <b>C</b> AATTTTTTT          |
| Ehlers-Danlos syndrome II                   | CS982129 | COL5A1      | T             | G        | GAGTGACT <b>G</b> ACCAGC          |
| Epidermolysis bullosa dystrophica           | CS094363 | COL7A1      | A             | G        | TGCTCT <b>G</b> AATTTCTTC         |
| Cystinosis, nephropathic                    | CS102107 | CTNS        | T             | C        | TCAGCAG <b>T</b> AATTAGA          |
| Iron overload                               | CS042809 | CYBRD1      | G             | C        | TCATCCT <b>G</b> TTTGTAA          |
| D-2-hydroxyglutaric aciduria                | CS050424 | D2HGDH      | A             | G        | AAACAT <b>G</b> AATTACC           |
| Muscular dystrophy, limb girdle 2B          | CS061275 | DYSF        | A             | G        | GCCACTC <b>A</b> CTCTGGC          |
| Cockayne syndrome                           | CS099993 | ERCC6       | A             | G        | CTTT <b>G</b> CA <b>A</b> ACTCCTA |
| Multiple exostoses ?                        | CS068396 | EXT1        | C             | A        | CCCTCCCC <b>C</b> ACTGCCT         |
| Hypoprothrombinaemia                        | CS984089 | F2          | C             | G        | CCGTAGC <b>C</b> TACTCC           |
| Haemophilia A                               | CS076620 | F8          | A             | G        | CTGTCAG <b>A</b> CAACCAA          |
| Haemophilia B                               | CS982186 | F9          | A             | G/T      | ACCGTT <b>A</b> ATTTGTCT          |
| Haemophilia B ?                             | CS045815 | F9          | C             | G        | GCTGTT <b>A</b> CTGTCTAT          |
| Fanconi anaemia                             | CS032696 | FANCA       | A             | G        | TGTTCTC <b>A</b> TTCTGTG          |
| Contractural arachnodactyly                 | CS072199 | FBN2        | A             | C        | CATACT <b>A</b> AGATATTG          |
| Contractural arachnodactyly                 | CS971736 | FBN2        | T             | G        | CACATACT <b>A</b> AGATAT          |
| Protoporphyrin, erythropoietic              | CS920753 | FECH        | C             | T        | TTTCAT <b>G</b> CGAGCACT          |
| Glycogen storage disease 2                  | CS971738 | GAA         | T             | G        | TCCCTC <b>A</b> TGAAGTCG          |
| Thalassaemia beta                           | CS810003 | HBB         | G             | A        | GCCTATT <b>G</b> GTCTATT          |
| Thalassaemia beta                           | CS001426 | HBB         | T             | C        | CTGCCTAT <b>T</b> GGTCTA          |
| Sandhoff disease                            | CS890126 | HEXB        | G             | A        | TGCTTG <b>C</b> GGGGGGAT          |
| Diabetes, MODY                              | CS083240 | HNF4A       | A             | G        | CCATCC <b>A</b> ACCATCCA          |
| Glanzmann thrombasthenia                    | CS061294 | ITGA2B      | A             | C        | CCCTCTC <b>A</b> CCCTCAG          |
| Long QT syndrome                            | CS094892 | KCNH2       | A             | G        | GGGGCT <b>G</b> AGCTCCCT          |
| Fish eye disease                            | CS961608 | LCAT        | T             | C        | GCTGCC <b>C</b> TGACCCCT          |
| Hypercholesterolaemia                       | CS961611 | LDLR        | C             | T        | CTCCTGG <b>C</b> GCTGATG          |

**“Large-scale mapping of branchpoints in human pre-mRNA transcripts *in vivo*.” Taggart et al.**

|                                            |          |        |   |      |                           |
|--------------------------------------------|----------|--------|---|------|---------------------------|
| Mediterranean fever, familial              | CS055595 | MEFV   | A | G    | AAATTCA <b>A</b> GCTTTTC  |
| Multiple endocrine neoplasia 1             | CS067834 | MEN1   | C | A    | GACCCT <b>C</b> CTCCCC    |
| Cardiomyopathy, hypertrophic ?             | CS041890 | MYBPC3 | C | A    | AGCCTCA <b>C</b> TGGGGGT  |
| Usher syndrome 1b                          | CS991465 | MYO7A  | G | A    | GGCCTCT <b>G</b> ACATGCG  |
| Neurofibromatosis 2 ?                      | CS942129 | NF2    | T | A    | ACTTAGCT <b>C</b> CCAATGA |
| Niemann-Pick disease C                     | CS043367 | NPC1   | A | G    | TCCACTA <b>A</b> TGCTATT  |
| Congenital disorder of glycosylation 1a    | CS061318 | PMM2   | A | G    | CATTCTA <b>A</b> GTGTTTT  |
| Congenital disorder of glycosylation 1a    | CS061319 | PMM2   | A | G    | AGCCTT <b>C</b> ATCTGTAC  |
| Protein C deficiency                       | CS952206 | PROC   | T | G    | TGGCC <b>G</b> TGACCCCC   |
| Pancreatitis, chronic ?                    | CS066647 | PRSS1  | C | T    | CTCCATA <b>C</b> AACCTGT  |
| Retinoblastoma ?                           | CS063381 | RB1    | A | G    | ATCCTCG <b>A</b> CATTGAT  |
|                                            |          |        |   | C/G/ |                           |
| Retinoblastoma                             | CS083264 | RB1    | A | T    | ATTACTA <b>A</b> TTGGTAT  |
| Brugada syndrome                           | CS994154 | SCN5A  | C | T    | ACAAGGG <b>C</b> CTAATGC  |
| Paraganglioma                              | CS013318 | SDHD   | T | C    | GGTTTTT <b>T</b> ATTGATG  |
| Cystinuria                                 | CS050111 | SLC3A1 | C | G    | AGGGTA <b>A</b> CCATGTCTG |
| Pancreatitis, chronic ?                    | CS032084 | SPINK1 | A | T    | GGAAAT <b>G</b> ATTCTGTT  |
| Extrapyramidal movement disorder           | CS003079 | TH     | T | A    | TCTGGG <b>C</b> TGATGCTG  |
| Tuberous sclerosis                         | CS992717 | TSC1   | T | C    | GTTGGT <b>G</b> TCCTCAA   |
| Porphyria, erythropoietic                  | CS100777 | UROS   | T | G    | GGTGT <b>G</b> CTGAAGCCC  |
| X-linked myopathy with excessive autophagy | CS092160 | VMA21  | A | C/T  | GGTTCT <b>G</b> ATTTTCTC  |
| Von Willebrand disease 1                   | CS070412 | VWF    | A | T    | GCAAGT <b>G</b> ACCTCCTT  |
| Thrombocytopaenia ?                        | CS102394 | WAS    | A | C    | AGGATT <b>C</b> ACTGGAGT  |
| Xeroderma pigmentosum (C)                  | CS040564 | XPC    | A | G    | AGTGG <b>A</b> GATAGAGAT  |

**Supplementary Table 1 Human disease alleles that disrupt branchpoints.**

We selected the 66 HGMD disease-causing splicing mutations that fell 20 to 35 bases upstream of a 3' splice site for examination (62 unique mutation positions). The table lists the disease, HGMD ID, gene alias, wildtype allele, mutant allele and 15nt sequence window around the mutation. These sequences were aligned to create the branchpoint motif in Supplementary Figure 1.

“Large-scale mapping of branchpoints in human pre-mRNA transcripts *in vivo*.” Taggart et al.

Supplementary Table 2

|               | BPS (Position) |               |                  |
|---------------|----------------|---------------|------------------|
| Sequence From | RT-PCR         | Illumina Data | Gao et al., 2008 |
| ACTB          | CCAGTG (-29)   | NA            | CCAGTG (-29)     |
|               | TGTGAC (-25)   |               |                  |
|               | TGACAT (-23)   |               |                  |
|               | ACATGG (-21)   |               |                  |
|               | CAGATC (0)     |               |                  |
|               | CGT CTG (-57)  |               |                  |
| CAD           | TGCCAC (-29)   | TGCCAC (-29)  | NA               |
|               | GCCACC (-28)   | GCCACC (-28)  |                  |
|               | CACTTG (-23)   | TGCTGC (-32)  |                  |
| EEF1A1        | TGTGTT (-37)   | TAACCA (-27)  | AACGAC (-18)     |
|               | GGAGTT (-43)   |               |                  |
| EIF4G3        | TAATTT (-41)   | GTAATT (-42)  | NA               |
|               | GTAATT (-42)   |               |                  |
|               | TAATAG (-47)   |               |                  |
|               | TTTTAT (-36)   |               |                  |
| EP300         | CAG GTT (0)    | CAGGTT (0)    | NA               |
|               | CTTCCA (-3)    |               |                  |
| FTCD          | ACCCCT (-22)   | TACCAG (-28)  | NA               |
| FUNDC2        | TCATTT (-31)   | CTCATT (-32)  | NA               |
|               | AATAAC (-48)   |               |                  |
| HSPG2         | CTCCAC (-38)   | CTCCAC (-38)  | NA               |
| KIAA0441      | TGACAC (-24)   | AAGGCC (0)    | NA               |
|               | ACT GAC (-26)  |               |                  |
| KIAA0913      | CCCACC (-19)   | GCCAC (-20)   | NA               |
| MCM7          |                | TGCTCT (-35)  | NA               |
|               |                | TCCTGT (-41)  |                  |
|               |                | ATCCTG (-42)  |                  |
|               | CCATCC (-44)   | CCATCC (-44)  |                  |
|               |                | CCCATC (-45)  |                  |
|               |                | TTCCCC (-48)  |                  |
|               | CTCCTT (-53)   | CTCCTT (-53)  |                  |
|               | CTCTCC (-55)   | CTCTCC (-55)  |                  |
|               | GCTCTC (-56)   | GCTCTC (-56)  |                  |
|               |                | TGCTCT (-57)  |                  |
|               | CTCTGT (-62)   |               |                  |
| PSMC3         | TCCTTT (-27)   | CTCCTT (-28)  | NA               |
|               | CTCCTT (-28)   |               |                  |
|               | GCTCCT (-29)   |               |                  |
|               | GTCTGC (-52)   |               |                  |
| RAB9A         | GGTATA (-35)   | GTA ATG (-22) | NA               |
|               | TATAAA (-33)   |               |                  |
|               | TGTGTA (-41)   |               |                  |
| SEZ6L2        | CAGGAT (0)     | CAGGAT (0)    | NA               |
| VEZF1         | AAGTTT (0)     | AAGTTT (0)    | NA               |
| WDR74         | AGCCCT (-28)   | AGCCCT (-28)  | NA               |
|               | GCCCTG (-27)   |               |                  |

**“Large-scale mapping of branchpoints in human pre-mRNA transcripts *in vivo*.” Taggart et al.**

**Supplementary Table 2.** RT-PCR Validation of Illumina predicted branchpoints  
Branchpoint predictions inferred from deep sequencing reads were compared to RT-PCR predictions and to a previous study of lariats in 20 human housekeeping genes<sup>1</sup>

“Large-scale mapping of branchpoints in human pre-mRNA transcripts *in vivo*.” Taggart et al.

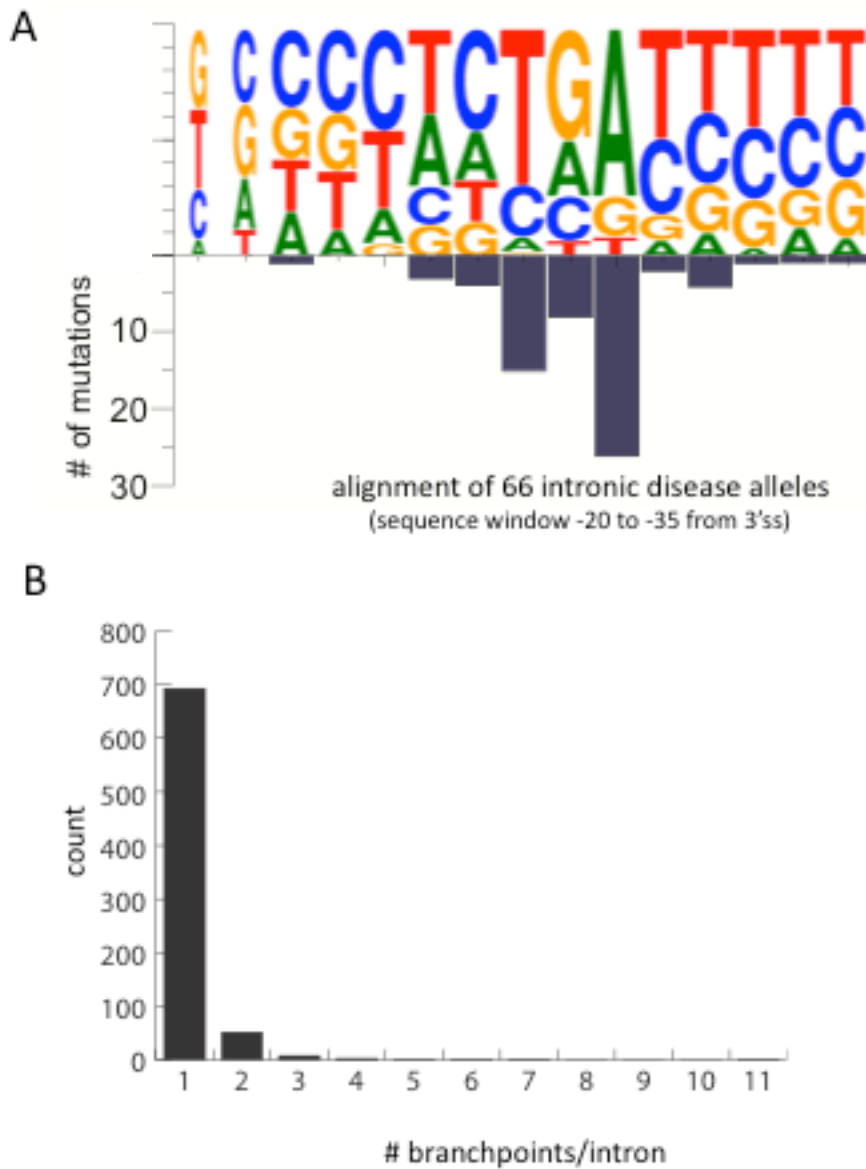

**Supplementary Figure 1 Evidence for redundant and for non-redundant branchpoints in human pre-mRNA.** A) Evidence for non-redundant branchpoints. The Human Gene Mutation Database was used to isolate splicing mutants that fall 20 - 35 nucleotides from the 3'ss, representing genetically defined non-redundant branchpoints. Alignment of sequences reveals branchpoint TRAY motif. The numbers of mutations at each position in the aligned motif are represented below. B) Evidence for redundant branchpoints: the distribution of branchpoints multiplicity per intron is represented by histogram covering 862 branchpoints in 760 introns. 9% of all introns sampled map to multiple lariat isoforms that utilize alternate branchpoints.

“Large-scale mapping of branchpoints in human pre-mRNA transcripts *in vivo*.” Taggart et al.

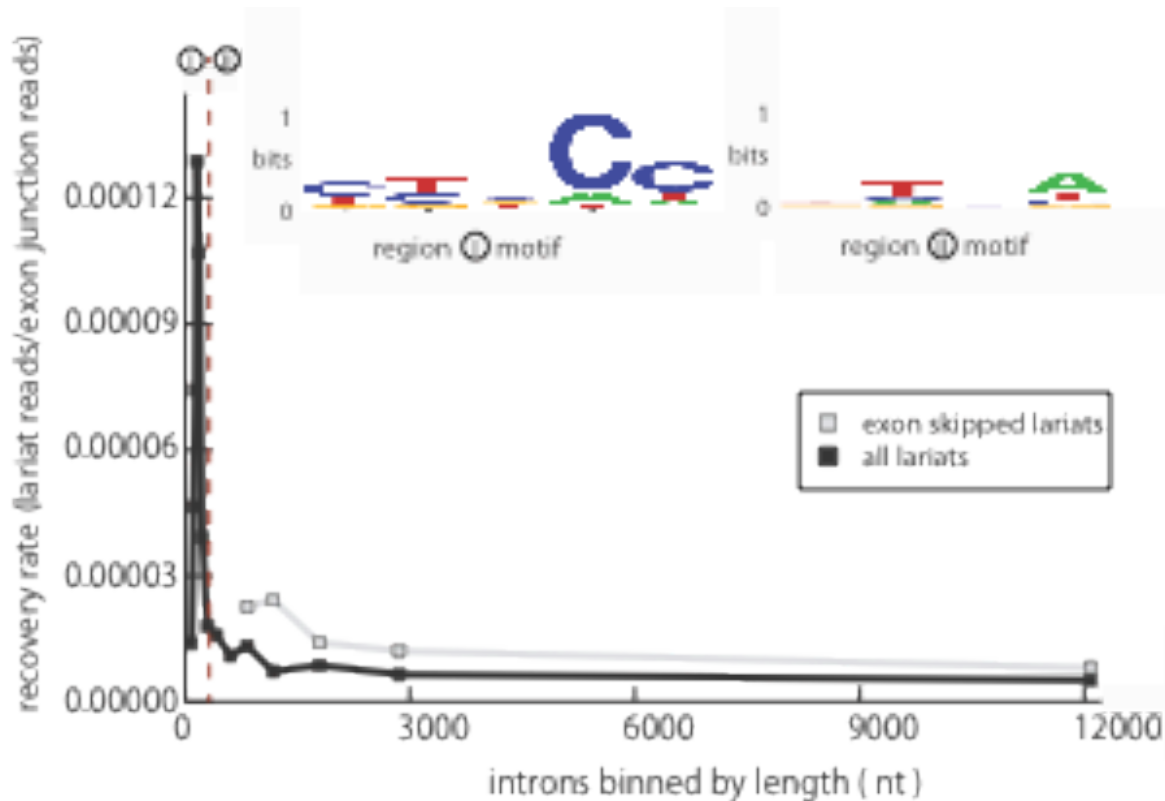

**Supplementary Figure 2. Detection rate of lariats by intron length** Only a fraction of the lariats created by splicing events were recovered (i.e. sampled by the Illumina deep sequencing data). Introns are binned by size and splicing events counted in the lariat and exon junction data. Exon junction data was used to estimate the expected lariat counts. The ratio demonstrates small introns are recovered as much as 10 times higher frequency than large introns. Branchpoint motifs from introns < 250 nucleotides contain a C rather than A. Intron turnover is initiated by debranching followed by rapid exonuclease digestion. As the rate limiting step in lariat turnover is debranching<sup>2</sup> and lariats that branch at C are debranched less efficiently<sup>3</sup>, this result suggests that the initiations of turnover of small introns is more dependent on DBR1 than large introns.

“Large-scale mapping of branchpoints in human pre-mRNA transcripts *in vivo*.” Taggart et al.

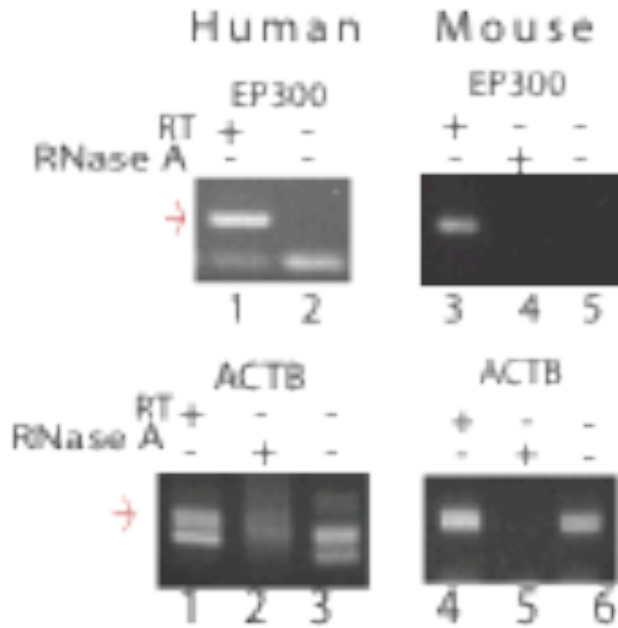

**Supplementary Figure 3. Conservation of intron circularization in mouse.** Orthologous intron in mouse were assayed by lariat RT-PCR. Red arrows represent lariat product sizes predicted from deep sequencing or human ortholog. PCR products were verified by sequencing. The RNA dependence of the amplification was verified by the omission of RT or pretreatment with RNase A.



“Large-scale mapping of branchpoints in human pre-mRNA transcripts *in vivo*.” Taggart et al.

|                    |   | Nucleotide in pre-mRNA |     |     |    |
|--------------------|---|------------------------|-----|-----|----|
|                    |   | A                      | T   | C   | G  |
| Nucleotide in Read | A | 209                    | 2   | 47  | 4  |
|                    | T | 465                    | 217 | 37  | 9  |
|                    | C | 27                     | 14  | 967 | 25 |
|                    | G | 0                      | 0   | 2   | 41 |

**Supplementary Figure 4. Mutational profile of reverse transcriptase at branchpoints.** Mutational matrix calculated from 2066 lariat/pre-mRNA alignments. A contingency table describes the correspondence between the sequence in the read and the sequence in the pre-mRNA as inferred from the reference genome. As branchpoint A is particularly mutable and often creates a transversion, distinct from the background mutational bias towards transitions, this mismatch represents a strong signal that can be used in future identification of lariat reads.

### 3) Supplementary Methods:

#### A) Computational Methods

##### I. Lariat Discovery

**Overview** Lariats were identified by inverted gapped alignments that mapped at the 5' splice site (5'ss) and within 500 nt of 3' splice site (3'ss) that had been annotated or observed in EST or deep sequencing data. Lariats outside of annotated sites were determined by scoring the quality of match to the 5'ss at the region in the read immediately downstream of the point of inversion (Figure 1A). Scoring *bona fide* lariats for matches to the 5'ss motif we find that 83% score greater than 6.0. Of inverted gapped intronic alignments that lack transcript support, 0.5% score greater than 6.0 - a two fold excess relative to non-inverted gapped intronic alignments (0.22%) or random intronic windows sampled (0.29%). Reverse transcriptase mutation rate is forty fold higher reading through a 2'-5' (vs 3'-5') phosphodiester bond (Supplementary Figure 2). Demanding this mutation at potential lariats increases this two fold excess to thirteen fold. From this high confidence set the proportion of each class of event is extrapolated to the whole data set.

##### Illumina Dataset.

To identify lariat branchpoints, we analyzed the Illumina Human Body Map 2.0 total RNA deep sequencing library. Reads consist of RNA samples derived from 16 human tissues. Most reads are 100 bp in length and all linker sequences were removed prior to analysis.

##### Hg19 Annotated.

We discovered branch points by searching for reads with non-canonical arrangements of intronic sequences. Reads that aligned to the hg19 genome with 3 or less mismatches were eliminated. Each remaining read was split into all possible head and tail segments, in which all heads and tails were at least 15 nt long. We mapped all head and tail segments to the hg19 genome using bowtie<sup>4</sup>. Head and tail segments were required to map to only one place in the genome and without any errors. Reads with segments that mapped in the expected order or did not map intronically were filtered from the dataset. The remaining inverted reads were mapped to splice sites. In cases where the read tail begins at the first nucleotide of the intron and the read head mapped within 500 nt upstream of a 3'ss, we determined that the read spans the lariat 2'-5' linkage. In cases where there is alignment ambiguity, we allow up to two mutations and assume the alignment in which the tail maps to the first nucleotide of the intron. The last nucleotide of the read head was determined to be the branchpoint. 2066 lariat reads were discovered through this screen (lariat\_0 – lariat\_2065 in BED track). Reads that suggested branchpoints supported by spliced EST evidence were also reported. Nine lariat reads were discovered through this screen (lariat\_2110 – lariat\_2118 in BED track).

##### Unannotated, but with Illumina transcript support.

To discover lariats forming in transcripts that are unannotated in the hg19 assembly, we built a library of potential spliced products inferred from the inverted reads. For each inverted read that did not map to an annotated 5'ss, we constructed a potential upstream exon by taking an 85 nucleotide window immediately upstream of the read tail. We created an array of 200 potential downstream exons by taking 85 nucleotide windows at a distance of 1 to 200 nucleotides from the end of the read head. These windows were artificially spliced together to create a set of potential spliced products. We aligned the Illumina reads against these

## “Large-scale mapping of branchpoints in human pre-mRNA transcripts *in vivo*.” Taggart et al.

spliced products using bowtie, requiring that the read contained at least 15 nucleotides on either side of the splice junction and did not have any mismatches. In cases where a splice product was found and the implied intron contained a 5' GT and 3' AG sequence, the inverted read was determined to be a true lariat forming in an unannotated transcript. Forty-four additional lariat reads were discovered through this screen (lariat\_2066 – lariat\_2109 in BED track).

### **Lariats forming deep within introns.**

The remaining out-of-order reads with intronic heads and tails, but without annotated or Illumina transcript support, were studied. From these reads, we filtered a high confidence set of lariats by requiring that both the heads and tails were never annotated as exons (alternative events), the beginning of the tail had a patser score of at least 6.0 against a 5'ss position specific weight matrix, and the read had a mutation at the branchpoint<sup>5</sup>. The 5'ss position specific weight matrix was created by inputting all hg19 annotated 5'ss sequences into the patser program. From within this high confidence set of internal lariats, the mutational profile was similar to the mutational profile of the bona-fide lariats (mostly A-> T mutations). We counted the number of splicing events that used an annotated 5'ss without a 3'ss, an annotated 3'ss without a 5'ss, or an event deep within an intron (using no annotated splice sites). We also counted the number of bona-fide lariats that passed the patser score, mutational, and intronic filters, and used that fraction to extrapolate how many true lariats without transcript support we expect exist in our data.

As a control, in-order reads that were most likely caused from template switching were passed through these same filters. There is a 3.3 fold increase of out-of-order reads that pass these filters compared to in-order reads, and the mutational profile of the in-order reads was different than bona-fide lariats, suggesting that these internal lariats are truly forming.

**Identifying hereditary disease mutations in branchpoint motifs.** We selected the 66 HGMD disease-causing splicing mutations that fell 20 to 35 bases upstream of a 3'ss for examination (62 unique mutation positions). These mutations plus seven nucleotides of flanking sequence on either side were used as input for a ClustalW multiple sequence alignment<sup>6</sup>. We used a maximal gap open penalty in order to align the sequences without gaps. The ClustalW output was used to create a sequence logo with the application WebLogo 3<sup>7</sup>. We counted the number of times a mutation occurred at each position within the sequence logo to create a histogram showing how often a particular position within the sequence was affected by a splicing mutation.

## **II. Analysis**

### **Branch Point Characterization.**

**Conservation.** Introns with a minimum of 5 reads were separated into single branchpoint and multi-branchpoint categories. 51 introns were single branchpoint, 19 introns were multiclass containing a total of 71 branchpoints. Conservation of branchpoint motifs were estimated from mammalian phastCon score averaged over a 7 nt window centered on branchpoint. Single branchpoint introns had a higher level of conservation 0.229 versus 0.013. T-test was used to estimate significance: P value =  $10^{-22}$ .

## “Large-scale mapping of branchpoints in human pre-mRNA transcripts *in vivo*.” Taggart et al.

**Distance.** The branch point distance was measured as the distance between the last nucleotide of the read head to the first downstream annotated 3' splice site.

**Mutational Profile:** The mutational profile of reads that suggested a branch point at the last nucleotide of the intron (implying a circular intron) were compared to the mutational profile of all other reads with 'G' nucleotide branchpoint more distal from the 3'ss. A chi-squared test was used to show that these mutational profiles were significantly different.

**Comparison of BP Distance in Alternative/ Constitutive Events:** mRNA exon junction data was studied using tophat<sup>8</sup>. We created a junction file consisting of all possible constitutive and exon skipping events within each annotated transcript. We aligned the Illumina reads using the hg19 genome and this junction file to determine how many reads span each exon/exon junction. We calculated overall rates of alternative splicing and intersected this data with our lariat branchpoints that mapped to transcripts with alternative 3'ss or exon skipping alternative events. In cases where the lariat formed over a skipped exon or immediately upstream of a skipped exon, the branchpoint distance was measured to the first downstream exon. In cases where the lariat formed near an alternative 3'ss, the branchpoint distance was measured to the most upstream 3'ss. For all three classes of alternative events, p values were determined by randomly sampling the entire dataset 1000 times and counting how many times the average branchpoint distance was at least as extreme as the branchpoint distance in the alternative event.

### **Building Decision Tree to model 3'ss selection.**

#### **Overview:**

The number of 'AG' dinucleotides between the branchpoint and the 3'ss 'AG' were counted for the 2066 hg19 annotated lariats. 2066 introns were selected at random, and simulated branchpoints were selected by randomly distributing the branchpoint distance distribution that was observed in real lariats. The number of 'AG' dinucleotides between these simulated branchpoints and the 3'ss 'AG' were counted. This process was repeated 1000 times to generate a p-value.

AG selection analysis was determined using the C5.0 software tool<sup>9</sup>. Lariat introns with exactly one branchpoint and one used 3'ss were considered in this analysis. The used AG, immediately upstream AG (if extant), and downstream AG were included in the dataset. First, the data was organized into a decision tree using classifiers from the literature, including distance to branchpoint, distance to upstream and downstream AGs, the nucleotide upstream of the AG, and presence of secondary structure (Gibbs free energy determined using RNAfold)<sup>10</sup>. In this initial run, the only informative classifiers were the presence or lack of an upstream AG, the distance between the AG and the branchpoint, and the distance to upstream and downstream AGs. Next, a range of constraints for each of the distance classifiers were applied to the dataset, and C5.0 was run on each of combination of classifier constraints. The classifier sets with error rates lower than the literature classifier sets were run again on the dataset, this time using half of the dataset as training data, and the other half as testing. The highest predictive scoring classifier sets were subjected to 10-fold cross

## “Large-scale mapping of branchpoints in human pre-mRNA transcripts *in vivo*.” Taggart et al.

validation trials. These cross-validation trials were completed 1000 times. The classifier set with the highest average predictive accuracy was used to create the decision tree.

### **RNA-protein Interactions.**

Published CLIP data for FOX2<sup>11</sup>, PTB<sup>12</sup>, hnRNP C<sup>13</sup> and a panel of other hnRNP proteins<sup>14</sup> were mapped around our branchpoint coordinates. The FOX2, PTB, hnRNP A1, hnRNP A2B1, hnRNP F, hnRNP M, and hnRNP U datasets were smoothed by using the center CLIP coordinate and adding 15 nucleotides to either side. The raw hnRNP C CLIP reads were aligned using bowtie and the last nucleotide was used as the binding point (as described in study). We smoothed the hnRNP C data by adding 15 nucleotides to either side of the binding point. Of this set of proteins, we included CLIP tag density plots for the proteins with at least 1000 CLIP tag/lariat intron overlaps.

### **Lariat Recovery.**

Lariats are sampled from a steady state population that is determined by their rate of splicing and their rate of degradation. Influences that alter the stability and sequence of the observed lariats are described in Supplementary Figure 1.

The number of reads spanning each annotated exon/exon junction was determined using tophat. Lariats and exon/exon junctions were both binned by intron size. The recovery rate of a lariat read was calculated by counting the number of detected lariat reads and dividing it by the number of detected exon/exon junction reads within each intron bin. The error bars were calculated by resampling the lariat read data 1000 times and using the 95% confidence interval.

### **III Statistical tests**

Circular Introns have a significantly different mutational profile than conventionally located branchpoints in lariat introns - the  $\chi^2$  test was used to compare the proportion of reads with an unambiguous base substitution at the transition site when this site occurred at position 0 versus other locations. In Figure 1B, the average branchpoint-3'ss distance was measured for 2066 reads. Resampling was used to compare the average distance of a series of 1000 samples from different subset of alternative exons from the listed categories to the measured value. To determine the significance of 80% of the 3'ss being the first “AG” downstream of the splice site, permutation trials simulated branchpoints (maintaining average 3'ss/branchpoint distance) in introns to scan for first “AG”.

### **B) Experimental Methods**

**Overview of Validation** We performed nested RT-PCR to validate the branchpoint predictions of lariats in total RNA from HEK293 cells. All sequences (primer, PCR), experimental or computational protocols and statistical tests are available at <http://fairbrother.biomed.brown.edu/data/Lariat>

#### **Analysis of Branch Points by Nested RT-PCR**

We performed RT-PCR analysis to generate an amplified product spanning the branchpoint of lariat splicing intermediates. HEK293 cells were grown to 80-90% confluence in

**“Large-scale mapping of branchpoints in human pre-mRNA transcripts *in vivo*.” Taggart et al.**

DMEM+10%FBS supplemented with 1000 U/ml of each penicillin and streptomycin (Gibco Cat#15140-122) at 37°C in 5% CO<sub>2</sub>. Total RNA was isolated using Trizol reagent (Invitrogen, Cat#15596-026) according to the manufacturer’s instructions with minor modifications. Following the initial precipitation of RNA, samples were digested with Turbo DNase (Ambion, Cat#AM2239) for 10 min at 37°C to remove any DNA contamination. Samples were then extracted twice with 1:1 phenol:chloroform, pH 4.5 and twice with chloroform. RNA was then washed according to the manufacturer’s instructions and re-suspended in DEPC-treated H<sub>2</sub>O. cDNA was synthesized using random 9-mer primers (Integrated DNA Technologies) and Superscript-III Reverse Transcriptase (Invitrogen, Cat# 18080-093) according to the manufacturer’s instructions. PCR was then performed on 0.5µl of cDNA using the “outer” primer pair (sequences available at <http://fairbrother.biomed.brown.edu/data/Lariat>) with 0.5U Platinum Taq DNA Polymerase (Invitrogen, Cat#10966-018) in a total volume of 25µl according to the manufacturer’s instructions. If necessary, 1µl 20mg/ml RNase A was added to the PCR reactions and samples were incubated at 37°C for 30min before running the PCR. A second PCR using “nested” primers (sequences available at <http://fairbrother.biomed.brown.edu/data/Lariat>) was then performed with 0.5µl of the initial PCR product used as the template. It was necessary to optimize conditions separately for each reaction. Exact conditions are available upon request. The product of the second PCR was then separated on a 2% agarose gel and the appropriate bands were excised and purified using a Quiagen gel extraction kit (Quiagen, Cat#28704). PCR products were then cloned into pCR2.1 using a TOPO TA Cloning Kit (Invitrogen, Cat#45-0641) and transformed into TOP10 *E. coli* cells. Individual colonies were then grown in LB+ampicillin and plasmid DNA was isolated using a Quiagen Miniprep Kit (Quiagen, Cat#27106) and was subsequently sequenced.

1. Gao, K., Masuda, A., Matsuura, T. & Ohno, K. Human branch point consensus sequence is yUnAy. *Nucleic Acids Res* **36**, 2257-67 (2008).
2. Nam, K., Lee, G., Trambly, J., Devine, S.E. & Boeke, J.D. Severe growth defect in a *Schizosaccharomyces pombe* mutant defective in intron lariat degradation. *Mol Cell Biol* **17**, 809-18 (1997).
3. Nam, K. et al. Yeast lariat debranching enzyme. Substrate and sequence specificity. *J Biol Chem* **269**, 20613-21 (1994).
4. Langmead, B., Trapnell, C., Pop, M. & Salzberg, S.L. Ultrafast and memory-efficient alignment of short DNA sequences to the human genome. *Genome Biol* **10**, R25 (2009).
5. Hertz, G.Z. & Stormo, G.D. Identifying DNA and protein patterns with statistically significant alignments of multiple sequences. *Bioinformatics* **15**, 563-577 (1999).
6. Chenna, R. et al. Multiple sequence alignment with the Clustal series of programs. *Nucl. Acids Res.* **31**, 3497-3500 (2003).
7. Crooks, G.E., Hon, G., Chandonia, J.M. & Brenner, S.E. WebLogo: a sequence logo generator. *Genome Res* **14**, 1188-90 (2004).
8. Trapnell, C., Pachter, L. & Salzberg, S.L. TopHat: discovering splice junctions with RNA-Seq. *Bioinformatics* **25**, 1105-1111 (2009).
9. Quinlan, R.S. Induction of Decision Trees. *Mach. Learn.* **1**, 81-106 (1986).

**“Large-scale mapping of branchpoints in human pre-mRNA transcripts *in vivo*.” Taggart et al.**

10. Ding, Y., Chan, C.Y. & Lawrence, C.E. Sfold web server for statistical folding and rational design of nucleic acids. *Nucl. Acids Res.* **32**, W135-141 (2004).
11. Yeo, G.W. et al. An RNA code for the FOX2 splicing regulator revealed by mapping RNA-protein interactions in stem cells. *Nat Struct Mol Biol* (2009).
12. Xue, Y. et al. Genome-wide analysis of PTB-RNA interactions reveals a strategy used by the general splicing repressor to modulate exon inclusion or skipping. *Mol Cell* **36**, 996-1006 (2009).
13. Konig, J. et al. iCLIP reveals the function of hnRNP particles in splicing at individual nucleotide resolution. *Nat Struct Mol Biol* **17**, 909-15.
14. Huelga, S.C. et al. Integrative Genome-wide Analysis Reveals Cooperative Regulation of Alternative Splicing by hnRNP Proteins. **1**, 167-178.
